# Supplementary material for: Clinical Risk Score for the Prediction of Incident Atrial Fibrillation: Derivation in 7 220 654 Taiwan Patients With 438 930 Incident Atrial Fibrillations During a 16‐Year Follow‐Up
Source: PubMed Central journal article supplement — J Am Heart Assoc. 2021 Aug 28;10(17):e020194. doi: 10.1161/JAHA.120.020194 (PMC8649261; doi:10.1161/jaha.120.020194), 2021-08-28
Supplement: JAH3-10-e020194-s001.pdf [file JAH3-10-e020194-s001.pdf]

# **Supplemental Material**

**Table S1. ICD-9-CM codes used to define the comorbidities.**

| Comorbidities                | ICD-9-CM codes                | Diagnostic criteria                               |
|------------------------------|-------------------------------|---------------------------------------------------|
| Hypertension                 | 401-405                       | Discharge or outpatient department $\geq 2$ times |
| Diabetes mellitus            | 250                           | Discharge or outpatient department $\geq 2$ times |
| Heart failure                | 428                           | Discharge diagnosis                               |
| Prior stroke                 | 433, 434, 436                 | Discharge diagnosis                               |
| Coronary artery disease      | 411, 413, 414                 | Discharge or outpatient department $\geq 2$ times |
| Myocardial infarction        | 410, 412                      | Discharge diagnosis                               |
| Peripheral vascular diseases | 443.8, 443.9                  | Discharge or outpatient department $\geq 2$ times |
| COPD                         | 491, 492, 493.2, 496          | Discharge or outpatient department $\geq 2$ times |
| Autoimmune diseases          | 279.4, 710, 714, 711.1, 711.2 | Discharge or outpatient department $\geq 2$ times |
| Liver cirrhosis              | 571.2, 571.5                  | Discharge or outpatient department $\geq 2$ times |
| Hyperthyroidism              | 242                           | Discharge or outpatient department $\geq 2$ times |
| CKD                          | 580-589                       | Discharge or outpatient department $\geq 2$ times |
| ESRD                         | 585.6                         | Discharge or outpatient department $\geq 2$ times |
| Anemia                       | 280-285                       | Discharge or outpatient department $\geq 2$ times |
| Alcoholism                   | 305.00-305.03, 303.90-303.93  | Discharge or outpatient department $\geq 2$ times |

CKD = chronic kidney disease; COPD = chronic obstructive pulmonary disease; ESRD = end-stage renal disease

**Table S2. AUCs of different scoring schemes in the prediction of AF after different follow-up durations.**

| Follow up duration | C2HEST Score          |         | CHA <sub>2</sub> DS <sub>2</sub> -VASc score |         | CHADS <sub>2</sub> score |         |
|--------------------|-----------------------|---------|----------------------------------------------|---------|--------------------------|---------|
|                    | AUC (95% CI)          | P value | AUC (95% CI)                                 | P value | AUC (95% CI)             | P value |
| 1 year             | 0.840 (0.837 – 0.843) | < 0.001 | 0.809 (0.806 – 0.812)                        | < 0.001 | 0.811 (0.808 – 0.814)    | < 0.001 |
| 3 years            | 0.792 (0.790 – 0.794) | < 0.001 | 0.777 (0.775 – 0.779)                        | < 0.001 | 0.766 (0.764 – 0.767)    | < 0.001 |
| 5 years            | 0.769 (0.767 – 0.770) | < 0.001 | 0.760 (0.758 – 0.761)                        | < 0.001 | 0.745 (0.743 – 0.746)    | < 0.001 |
| 7 years            | 0.750 (0.748 – 0.751) | < 0.001 | 0.745 (0.743 – 0.746)                        | < 0.001 | 0.728 (0.726 – 0.729)    | < 0.001 |
| 10 years           | 0.724 (0.723 – 0.725) | < 0.001 | 0.723 (0.722 – 0.724)                        | < 0.001 | 0.704 (0.703 – 0.705)    | < 0.001 |
| 12 years           | 0.708 (0.706 – 0.709) | < 0.001 | 0.710 (0.709 – 0.711)                        | < 0.001 | 0.690 (0.689 – 0.691)    | < 0.001 |
| 16 years           | 0.670 (0.669 – 0.671) | < 0.001 | 0.676 (0.675 – 0.677)                        | < 0.001 | 0.655 (0.654 – 0.656)    | < 0.001 |

AF = atrial fibrillation; AUC = area under the receiver operating characteristic curve; CI = confidence interval

**Table S3. AUCs of Taiwan AF score in the prediction of AF after different follow-up durations for males and females.**

| Follow up duration | Taiwan AF score       |         |                       |         |
|--------------------|-----------------------|---------|-----------------------|---------|
|                    | Males                 |         | Females               |         |
|                    | AUC (95%CI)           | P value | AUC (95%CI)           | P value |
| 1 year             | 0.863 (0.861 - 0.864) | < 0.001 | 0.864 (0.862 - 0.867) | < 0.001 |
| 3 years            | 0.835 (0.833 - 0.837) | < 0.001 | 0.831 (0.829 - 0.833) | < 0.001 |
| 5 years            | 0.831 (0.829 - 0.833) | < 0.001 | 0.829 (0.827 - 0.831) | < 0.001 |
| 7 years            | 0.813 (0.812 - 0.814) | < 0.001 | 0.816 (0.813 - 0.818) | < 0.001 |
| 10 years           | 0.794 (0.792 - 0.796) | < 0.001 | 0.793 (0.792 - 0.795) | < 0.001 |
| 12 years           | 0.782 (0.78 - 0.785)  | < 0.001 | 0.783 (0.781 - 0.786) | < 0.001 |
| 16 years           | 0.754 (0.752 - 0.757) | < 0.001 | 0.753 (0.751 - 0.755) | < 0.001 |

AF = atrial fibrillation; AUC = area under the receiver operating characteristic curve; CI = confidence interval

**Table S4. AUCs of Taiwan AF score in the prediction of AF after different follow-up durations in different age strata.**

| Follow up duration | Taiwan AF score       |         |                       |         |                       |         |                       |         |
|--------------------|-----------------------|---------|-----------------------|---------|-----------------------|---------|-----------------------|---------|
|                    | <50 years             |         | 50-64 years           |         | ≥65 years             |         | ≥75 years             |         |
|                    | AUC (95%CI)           | P value |
| 1 year             | 0.859 (0.858 - 0.861) | < 0.001 | 0.860 (0.858 - 0.862) | < 0.001 | 0.864 (0.862 - 0.867) | < 0.001 | 0.866 (0.864 - 0.869) | < 0.001 |
| 3 years            | 0.827 (0.825 - 0.829) | < 0.001 | 0.831 (0.829 - 0.833) | < 0.001 | 0.834 (0.832 - 0.836) | < 0.001 | 0.835 (0.833 - 0.837) | < 0.001 |
| 5 years            | 0.826 (0.824 - 0.828) | < 0.001 | 0.829 (0.827 - 0.831) | < 0.001 | 0.832 (0.83 - 0.835)  | < 0.001 | 0.831 (0.829 - 0.834) | < 0.001 |
| 7 years            | 0.809 (0.806 - 0.811) | < 0.001 | 0.810 (0.808 - 0.812) | < 0.001 | 0.816 (0.813 - 0.818) | < 0.001 | 0.814 (0.811 - 0.817) | < 0.001 |
| 10 years           | 0.784 (0.782 - 0.786) | < 0.001 | 0.796 (0.794 - 0.799) | < 0.001 | 0.797 (0.795 - 0.799) | < 0.001 | 0.794 (0.792 - 0.796) | < 0.001 |
| 12 years           | 0.781 (0.779 - 0.783) | < 0.001 | 0.782 (0.779 - 0.786) | < 0.001 | 0.786 (0.783 - 0.789) | < 0.001 | 0.787 (0.784 - 0.790) | < 0.001 |
| 16 years           | 0.748 (0.746 - 0.749) | < 0.001 | 0.753 (0.751 - 0.756) | < 0.001 | 0.754 (0.752 - 0.756) | < 0.001 | 0.756 (0.754 - 0.757) | < 0.001 |

AF = atrial fibrillation; AUC = area under the receiver operating characteristic curve; CI = confidence interval

**Figure S1. ROC curves of Taiwan AF score in the prediction of incident AF.**

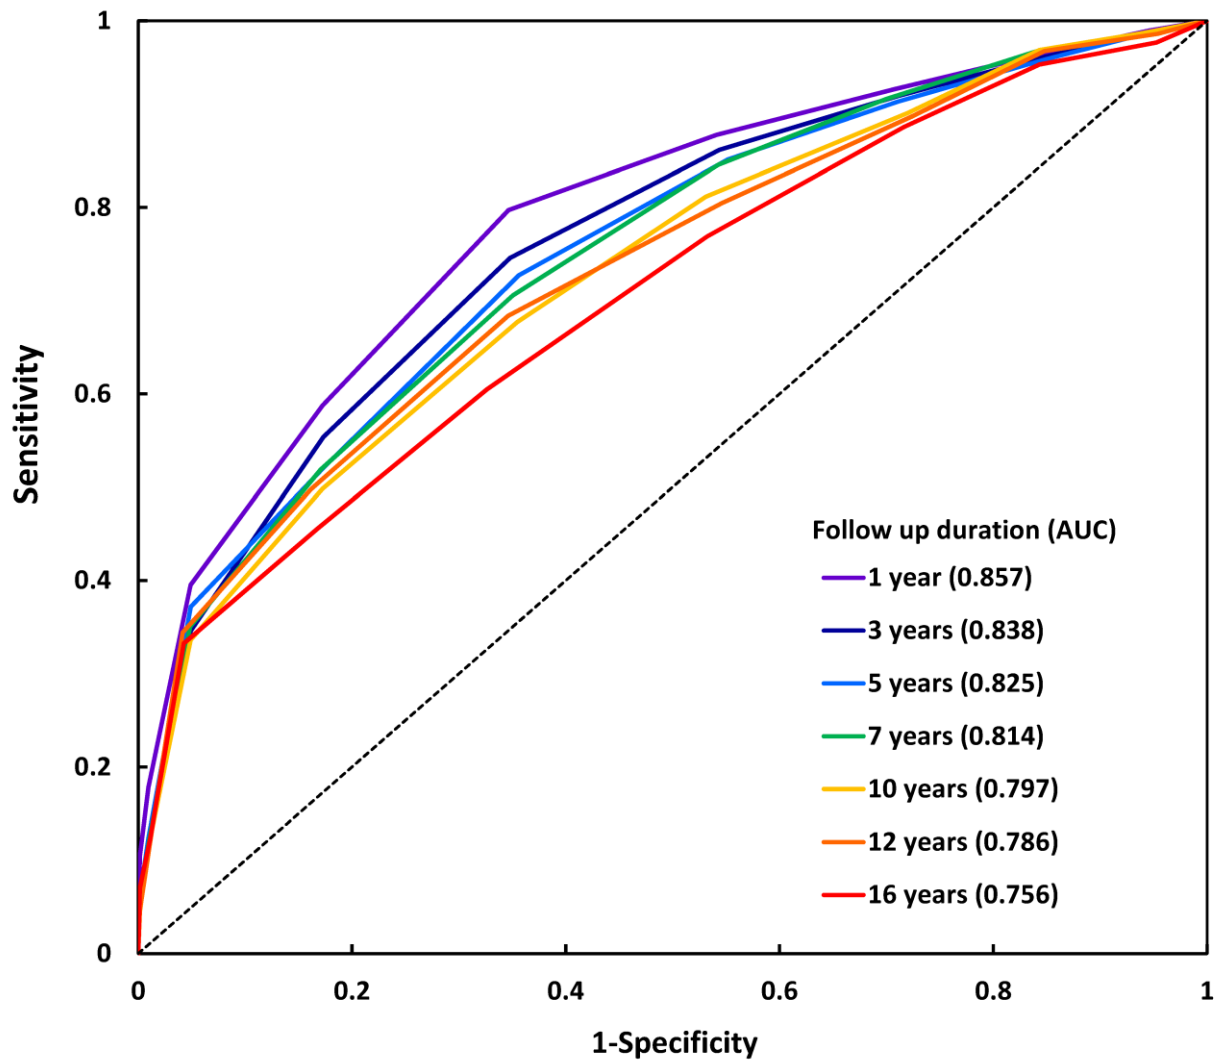

AF = atrial fibrillation; AUC = area under the receiver operating characteristic curve; ROC curve = receiver operating characteristic curve

**Figure S2. Observed and expected AF risks by decile of predicted risk.**

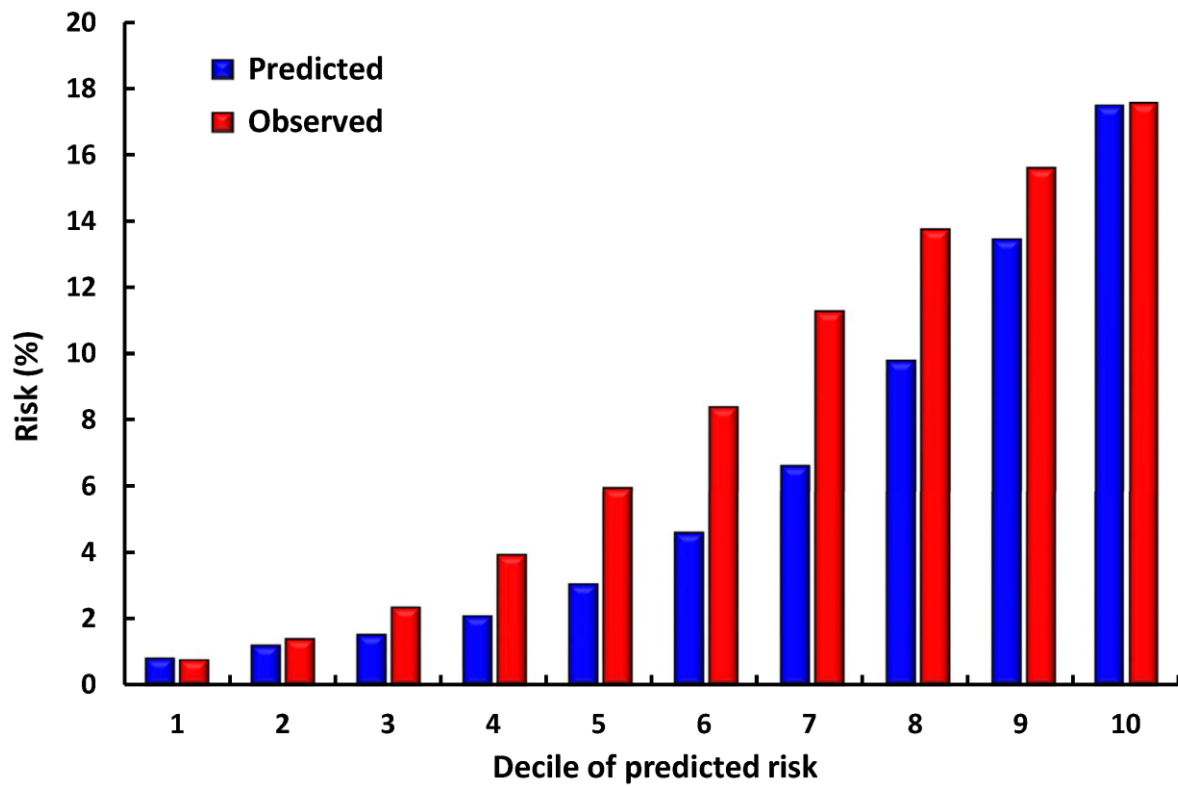

The predicted risk of AF in the 16-year risk deciles was similar to the observed risk and the calibration was adequate (Grønnesby-Borgan chi-square = 13.8,  $p = 0.129$ ).

AF = atrial fibrillation.
